# Supplementary material
Source: PubMed Central journal article supplement (PMC6121991)
Supplement: zam018188746s1.pdf [file zam018188746s1.pdf]

**Microbial community dynamics and assembly follows trajectories of an early spring diatom bloom in a semi-enclosed bay**

Huajun Zhang<sup>1</sup>, Kai Wang<sup>1,2</sup>, Lixin Shen<sup>1</sup>, Heping Chen<sup>1,4</sup>, Fanrong Hou<sup>1</sup>, Xiaoyan Zhou<sup>3</sup>, Demin Zhang<sup>1,2\*</sup>, Xiangyu Zhu<sup>3\*</sup>

<sup>1</sup> School of Marine Sciences, Ningbo University, Ningbo, 315211, China

<sup>2</sup> Collaborative Innovation Center for Zhejiang Marine High-efficiency and Healthy Aquaculture, Ningbo, 315211, China

<sup>3</sup> Ocean and Fishery Information Monitoring Center of Ningbo, Ningbo, 315010, China

<sup>4</sup> Faculty of Architectural, Civil Engineering and Environment, Ningbo University, Ningbo, 315211, China

\* For correspondence. E-mail: zhangdemin@nbu.edu.cn (Demin Zhang) or xiangshg@126.com (Xiangyu Zhu)

Summary of the numbers in supporting information:

The number of figures: 6

The number of tables: 3

**Table S1.** Spearman's correlation between microbial  $\alpha$ -diversity indices and environmental variables.

|                    | <b>Richness</b> | <b>PD</b> | <b>Shannon</b> | <b>Evenness</b> |
|--------------------|-----------------|-----------|----------------|-----------------|
| <b>Chl a</b>       | 0.426*          | 0.494**   | 0.352          | 0.119           |
| <b>DO</b>          | 0.386*          | 0.430*    | 0.070          | -0.299          |
| <b>pH</b>          | 0.289           | 0.368*    | 0.124          | -0.125          |
| <b>Salinity</b>    | -0.491**        | -0.531**  | -0.331         | -0.023          |
| <b>Ammonium</b>    | -0.467*         | -0.475**  | -0.090         | 0.337           |
| <b>Temperature</b> | -0.423*         | -0.465*   | -0.195         | 0.131           |
| <b>Nitrite</b>     | -0.264          | -0.318    | -0.046         | 0.215           |
| <b>Nitrate</b>     | -0.024          | -0.133    | 0.007          | 0.070           |
| <b>Phosphate</b>   | -0.245          | -0.301    | -0.025         | 0.237           |
| <b>Silicate</b>    | -0.116          | -0.244    | -0.072         | 0.046           |
| <b>COD</b>         | 0.218           | 0.298     | 0.132          | -0.035          |

\*\*  $P < 0.01$ ; \*  $P < 0.05$ ; PD: phylogenetic diversity; DO: dissolved oxygen; COD: chemical oxygen demand

**Table S2.** Random-forest analysis of the classification accuracy in each stage based on the 30 most abundant OTUs.

|           | <b>ES</b> | <b>MS</b> | <b>LS</b> | <b>AB</b> | <b>Prediction accuracy (%)</b> |
|-----------|-----------|-----------|-----------|-----------|--------------------------------|
| <b>ES</b> | 8         | 1         | 0         | 0         | 88.9                           |
| <b>MS</b> | 0         | 10        | 0         | 0         | 100                            |
| <b>LS</b> | 0         | 0         | 5         | 0         | 100                            |
| <b>AB</b> | 0         | 0         | 0         | 5         | 100                            |

**Table S3.** Simple Mantel tests for the correlations between environmental variables (Euclidean distance) and predicted gene table (Bray-Curtis distance) with 999 permutations.

| <b>Variables</b> | <b><math>\rho</math> (Mantel test)</b> | <b><i>P</i></b> |
|------------------|----------------------------------------|-----------------|
| <b>Nitrate</b>   | 0.374                                  | 0.001           |
| <b>Phosphate</b> | 0.338                                  | 0.007           |
| <b>Nitrite</b>   | 0.306                                  | 0.009           |
| <b>Silicate</b>  | 0.187                                  | 0.004           |
| <b>Ammonium</b>  | 0.134                                  | 0.092           |

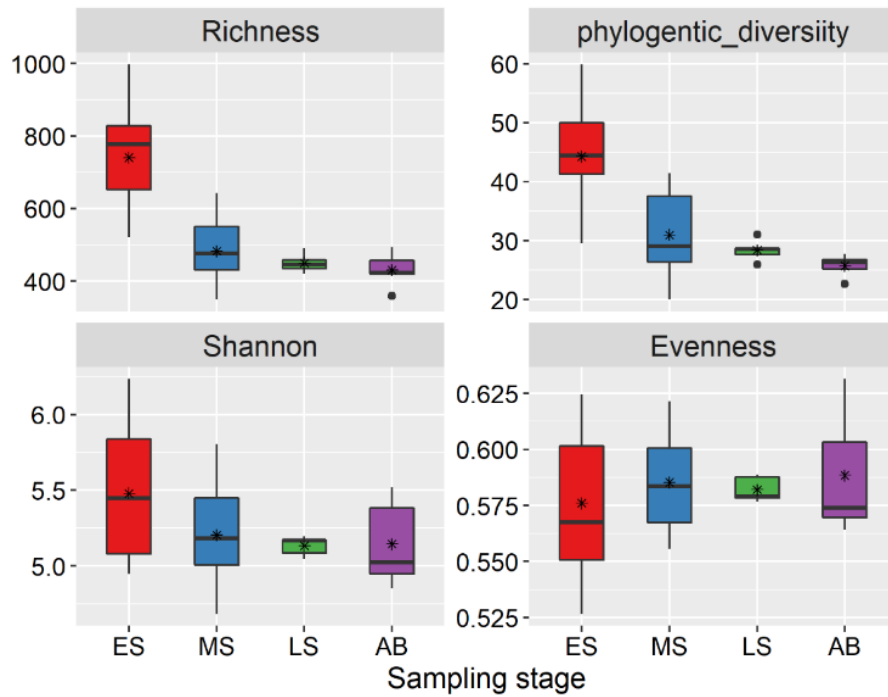

**Figure. S1** Boxplots of  $\alpha$ -diversity indices in each bloom stage, including richness, phylogenetic diversity, Shannon index, and evenness. The asterisk represents the average value.

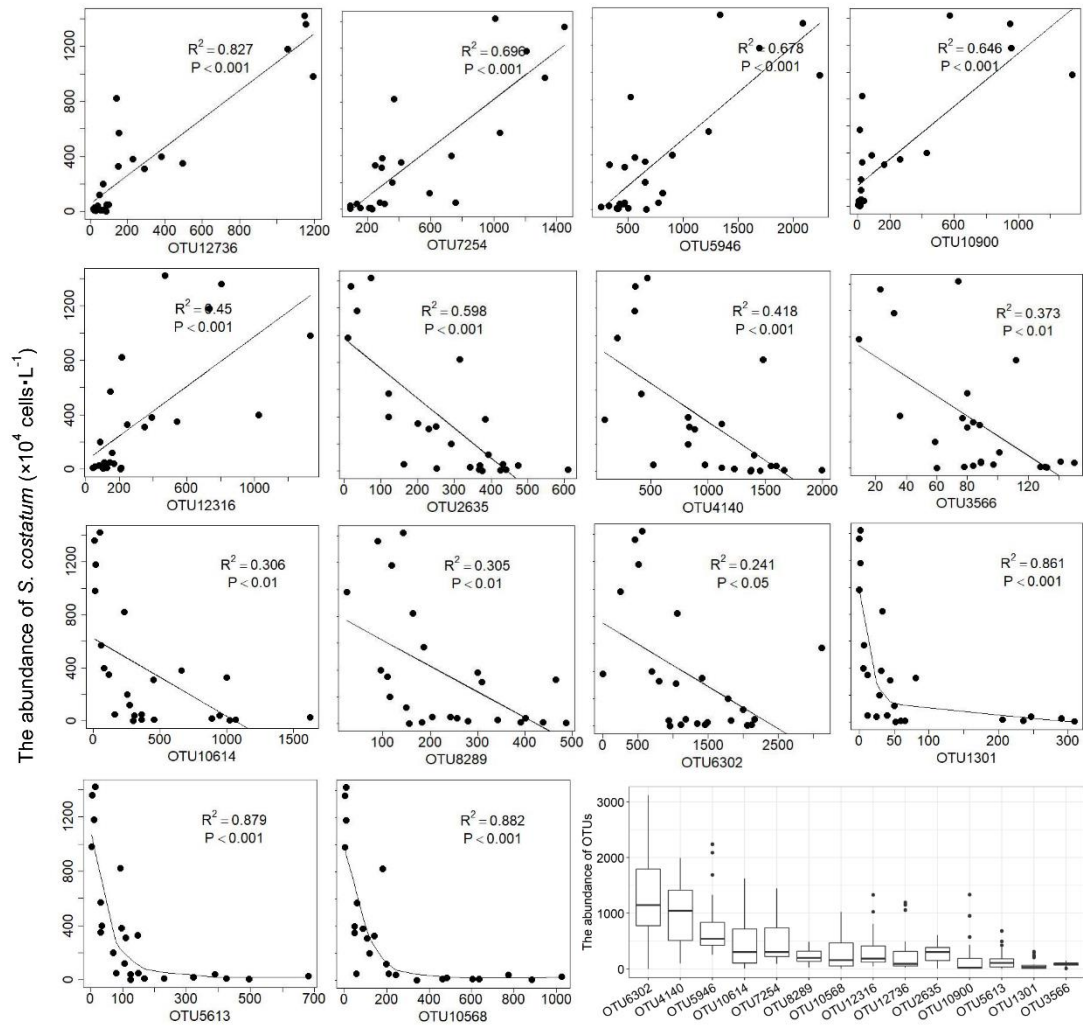

**Figure. S2** Relationship between 14 of the 30 most abundant OTUs and the abundance of *S. costatum*. Linear model was done by “lm” in R, and non-linear model was calculated by “lowess” in R.

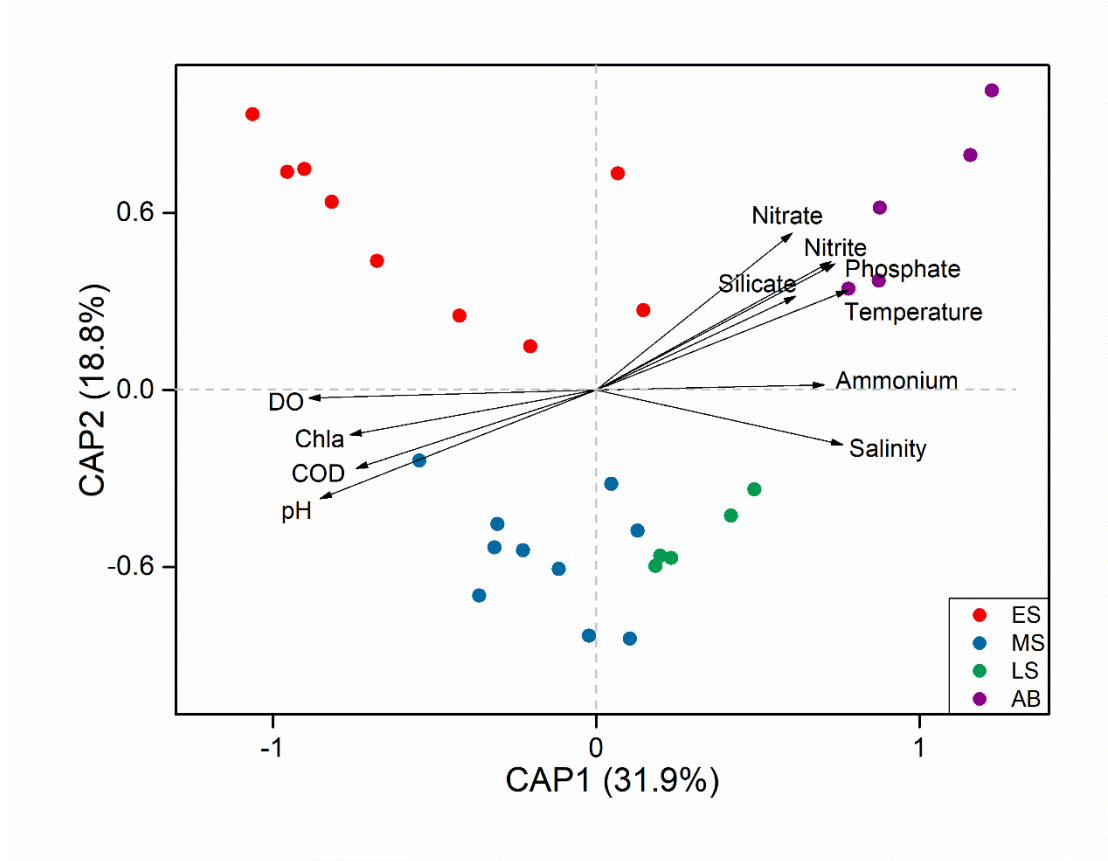

**Figure. S3** Bray-Curtis distance-based redundancy analysis of the correlations between MCCs and environmental variables, according to bloom stages. DO, dissolved oxygen; COD, chemical oxygen demand.

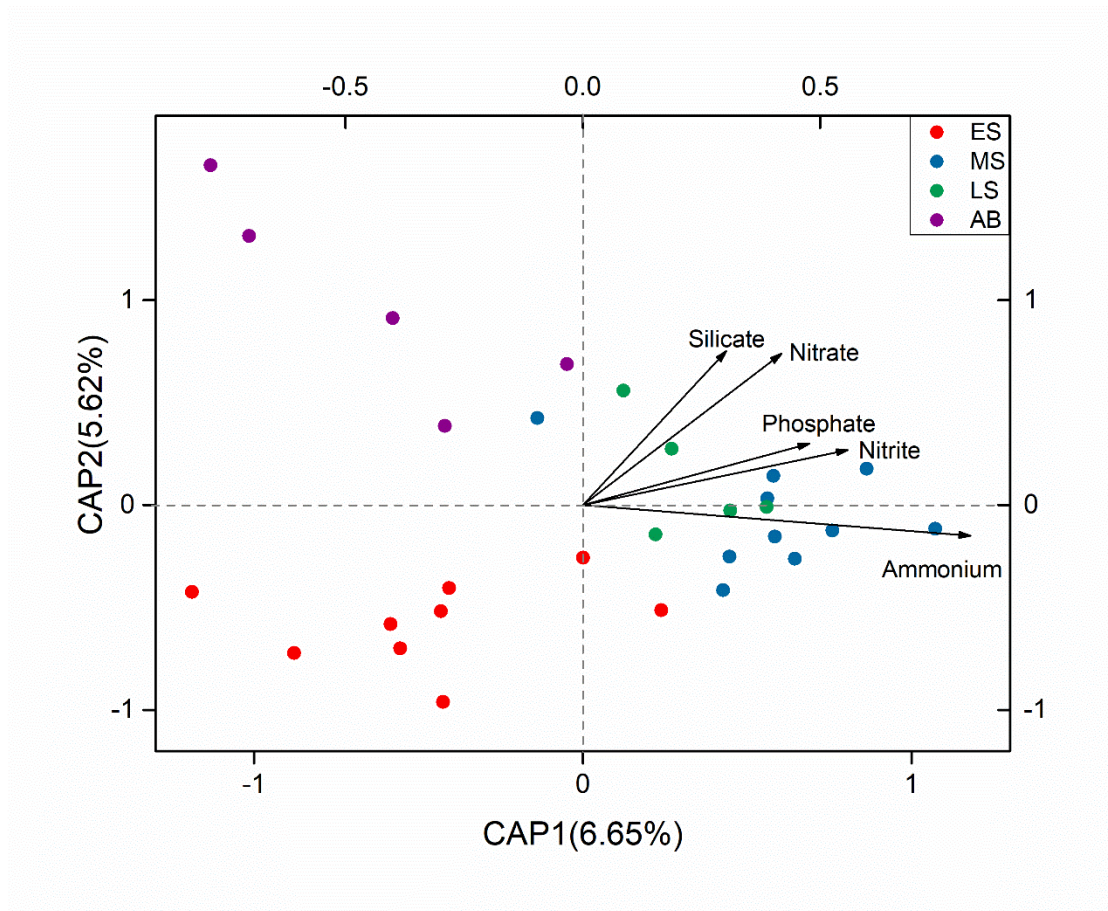

**Figure. S4** Bray-Curtis distance-based redundancy analysis of the correlations between predicted gene ontologies and environmental variables, according to bloom stages.

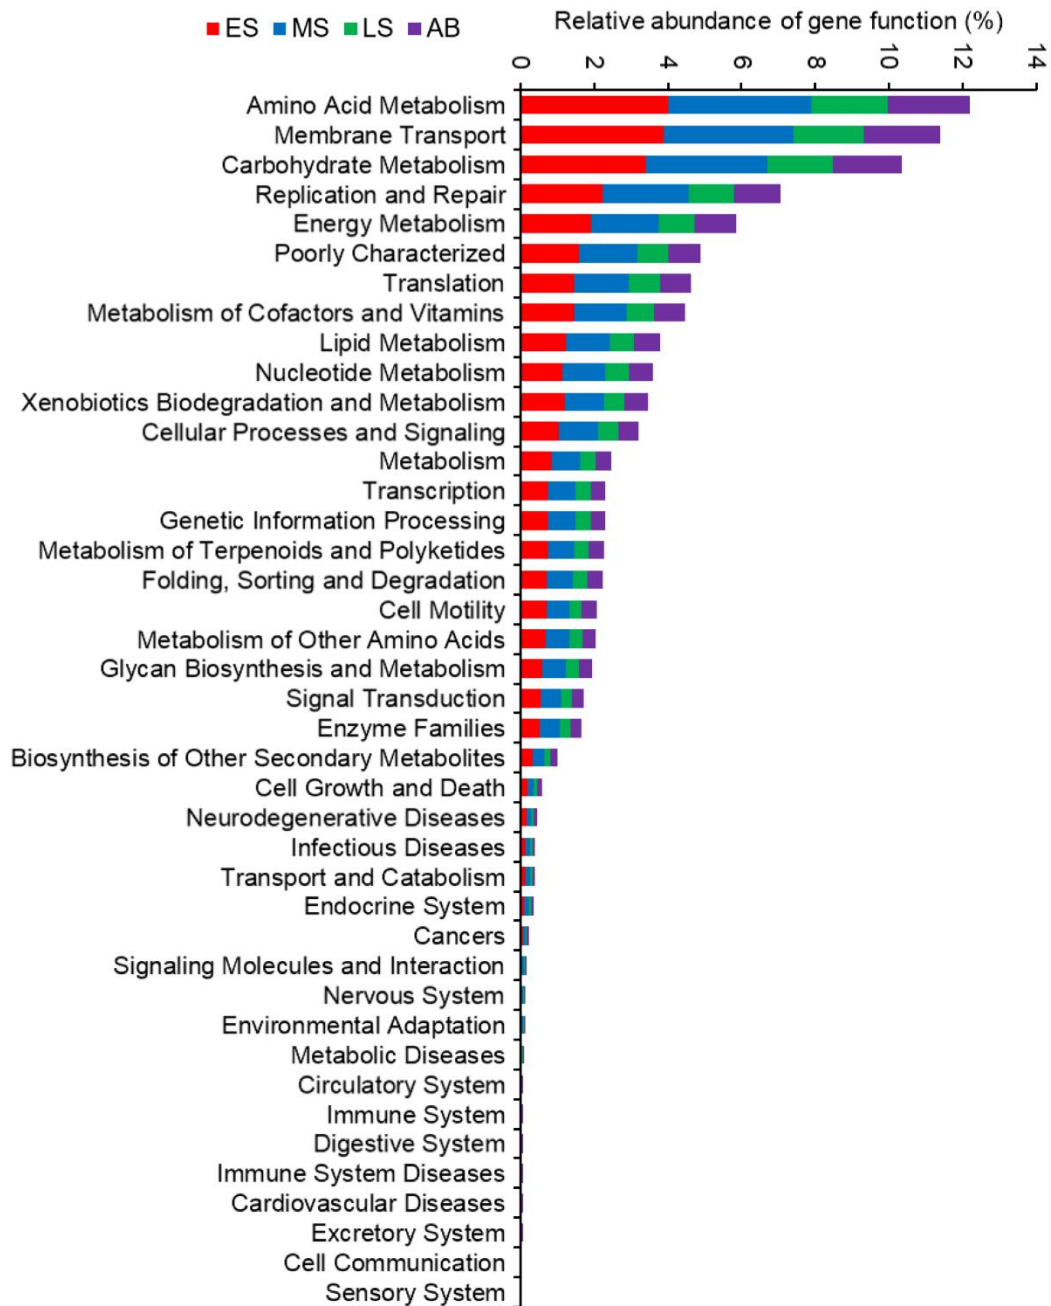

**Figure. S5** Relative abundance of predicted functions of the microbial communities during the bloom process.



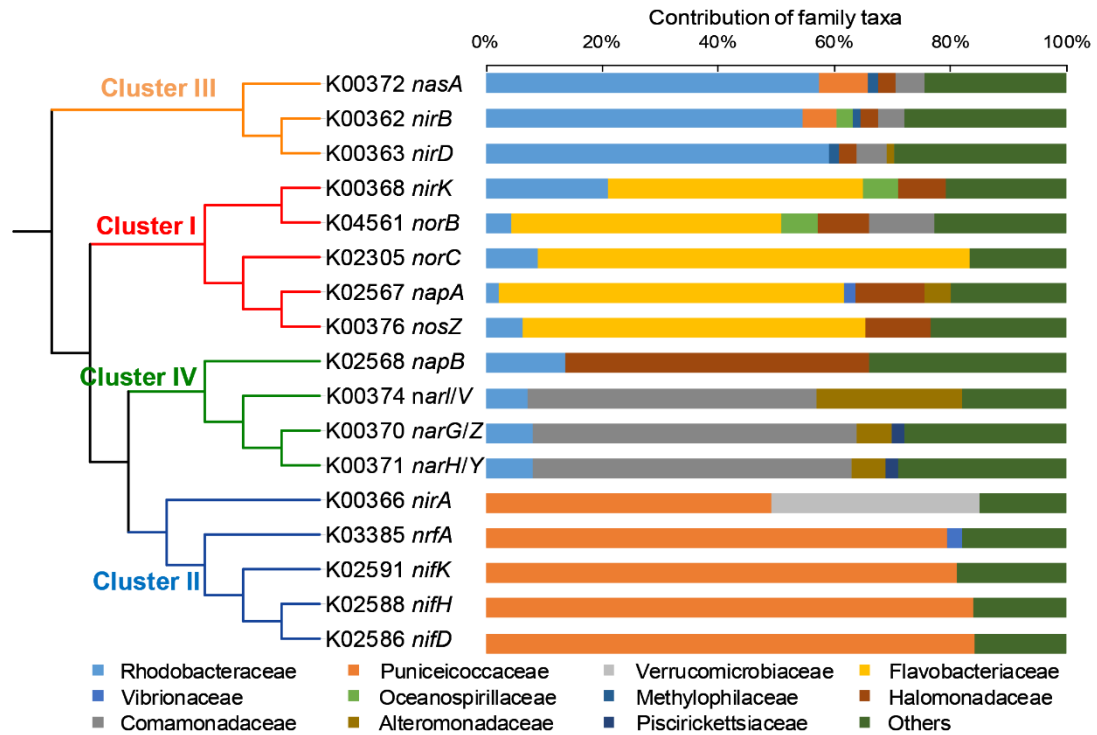

**Figure. S6** Relative percentage contributions of bacterial families for nitrogen metabolism-related genes in imputed metagenome. Only contributions above 1% were selected. The predicted genes were clustered based on the Bray-Curtis distance.
